# Supplementary material for: Phytosterol Contents of Edible Oils and Their Contributions to Estimated Phytosterol Intake in the Chinese Diet
Source: MDPI journal article supplement (doi:10.3390/foods8080334), 2019-08-09
Supplement: s1 [file s1]

# Phytosterol Contents of Edible Oils and Their Contribution to Estimated Phytosterols Intake in the Chinese Diet

Liangxiao Zhang\*

<sup>1</sup> Oil Crops Research Institute, Chinese Academy of Agricultural Sciences, Wuhan 430062, China

<sup>2</sup> Key Laboratory of Biology and Genetic Improvement of Oil Crops, Ministry of Agriculture and Rural Affairs, Wuhan 430062, China

<sup>3</sup> Laboratory of Quality and Safety Risk Assessment for Oilseed Products (Wuhan), Ministry of Agriculture and Rural Affairs, Wuhan 430062, China

<sup>4</sup> Key Laboratory of Detection for Mycotoxins, Ministry of Agriculture and Rural Affairs, Wuhan 430062, China

<sup>5</sup> Quality Inspection and Test Center for Oilseed Products, Ministry of Agriculture and Rural Affairs, Wuhan 430062, China

\* Correspondence: Corresponding authors: Dr. Liangxiao Zhang at Oil Crops Research Institute, Chinese Academy of Agricultural Sciences, Wuhan 430062, China Tel.: +86 27 86812943; Fax: +86 27 86812862 E-mail addresses: liangxiao\_zhang@hotmail.com (L. Zhang)

**Table S1. Information of oil samples.**

| Oil sample  |    | Brand                        | Description                     | Producing area                     |
|-------------|----|------------------------------|---------------------------------|------------------------------------|
| Peanut oil  | 1  | Red Dragonfly                | Pressed peanut oil              | Chongqing                          |
|             | 2  | Luhua                        | Peanut oil                      | Yantai City, Shandong Province     |
|             | 3  | Hope Full                    | First grade pressed peanut oil  | Langfang City, Hebei Province      |
|             | 4  | Leyouyou                     | First grade pressed peanut oil  | Dongying City, Shandong Province   |
|             | 5  | Chubao                       | Peanut oil                      | Guangzhou City, Guangdong Province |
|             | 6  | Daomai                       | Pure peanut oil                 | Shenzhen City, Guangdong Province  |
|             | 7  | Laoxiang                     | Mild pressed peanut oil         | Shenzhen City, Guangdong Province  |
|             | 8  | Fine Life                    | First grade peanut oil          | Linyi City, Shandong Province      |
|             | 9  | Arawana Grandmother Township | Mild pressed peanut oil         | Shanghai                           |
|             | 10 | Runji                        | First grade peanut oil          | Shanghai                           |
| Soybean oil | 1  | Red Dragonfly                | First grade soybean oil         | Chongqing                          |
|             | 2  | Yingma                       | Soybean oil                     | Zhongshan City, Guangdong Province |
|             | 3  | Lotus                        | Soybean oil                     | Guangzhou City, Guangdong Province |
|             | 4  | Arawana                      | Soybean oil                     | Shanghai                           |
|             | 5  | Arawana                      | Soybean oil                     | Shanghai                           |
|             | 6  | Jinye                        | Soybean oil                     | Zhenjiang City, Jiangsu Province   |
|             | 7  | Fulinmen                     | Soybean oil                     | Tianjin                            |
|             | 8  | Hope Full                    | First grade refined soybean oil | Langfang City, Hebei Province      |
|             | 9  | Zhongan                      | Cooked soybean oil              | Heilongjiang Province              |
|             | 10 | Lotus                        | Soybean oil                     | Guangzhou City, Guangdong Province |
|             | 11 | Gold Ingots                  | Soybean oil                     | Guangzhou City, Guangdong Province |

|              |    |                   |                                              |                                          |
|--------------|----|-------------------|----------------------------------------------|------------------------------------------|
|              | 12 | AKA               | First grade soybean oil                      | Nanjing City, Jiangsu Province           |
|              | 13 | Linlong           | Soybean oil                                  | Wuhan City, Hubei Province               |
|              | 14 | Zhongchang        | Soybean oil                                  | Wuhan City, Hubei Province               |
| Rapeseed oil | 1  | Xiancan           | Pure yellow rapeseed oil with special flavor | Chengdu City, Sichuan Province           |
|              | 2  | Xiancan           | First grade pressed rapeseed oil             | Chengdu City, Sichuan Province           |
|              | 3  | Huixiangsui       | Non-transgenic rapeseed oil                  | Chengdu City, Sichuan Province           |
|              | 4  | Fulinmen          | Rapeseed oil                                 | Suzhou City, Jiangsu Province            |
|              | 5  | Chulaixiang       | Rapeseed oil                                 | Hangzhou City, Zhejiang Province         |
|              | 6  | Ruyi              | Rapeseed oil                                 | Huzhou City, Zhejiang Province           |
|              | 7  | Evergrand Khingan | Green rapeseed oil                           | Hohhot, Inner Mongolia Autonomous Region |
|              | 8  | Guchuan           | Rapeseed oil                                 | Beijing                                  |
|              | 9  | Panzhongcan       | Pure rapeseed oil                            | Linxiang City, Hunan Province            |
|              | 10 | Knife             | Rapeseed oil with low erucic acid            | Shenzhen City, Guangdong Province        |
|              | 11 | Longquanshan      | Pure pressed rapeseed oil                    | Deyang City, Sichuan Province            |
|              | 12 | Laoxiang          | Mild pressed rapeseed oil                    | Shenzhen City, Guangdong Province        |
|              | 13 | Evergrand Khingan | Green rapeseed oil                           | Cuihua City, Heilongjiang Province       |
|              | 14 | Great Value       | Rapeseed oil                                 | Zunyi City, Guizhou Province             |
| Sesame oil   | 1  | Yusheng           | Sesame oil                                   | Fuling District, Chongqing               |
|              | 2  | Lovely Day        | Sesame oil                                   | Tianjin                                  |
|              | 3  | Xiang Wang        | Pure sesame oil                              | Chengdu City, Sichuan Province           |
|              | 4  | Santian           | Sesame oil                                   | Minhang Area, Shanghai                   |
|              | 5  | Yangshi           | Sesame oil                                   | Shaoxing City, Zhejiang Province         |
|              | 6  | Totole            | Sesame oil                                   | Zhumadian City, Hena Province            |
|              | 7  | Arawana           | Sesame oil                                   | Wuhan City, Hubei Province               |
|              | 8  | Lvbao             | Sesame oil                                   | Beijing                                  |

|              |    |                   |                                                   |                                   |
|--------------|----|-------------------|---------------------------------------------------|-----------------------------------|
|              | 9  | Ruifu             | Sesame oil                                        | Weifang City, Shandong Province   |
|              | 10 | Haitian           | Pure sesame oil                                   | Foshan City, Guangdong Province   |
|              | 11 | Longquanshan      | Pure sesame oil                                   | Mianyang City, Sichuan Province   |
|              | 12 | Yanzhuang         | Pure sesame oil                                   | Hefei City, Anhui Province        |
|              | 13 | Lee Kum Kee       | Sesame oil                                        | Jiangmen City, Guangdong Province |
|              | 14 | Great Value       | Pure sesame oil                                   | Shanghai                          |
|              | 15 | Blessing Mill     | Black sesame oil                                  | Wuhan City, Hubei Province        |
| Olive oil    | 1  | Ybarra            | Extra virgin olive oil                            | Spain                             |
|              | 2  | Bertolli          | Extra virgin olive oil                            | Italy                             |
|              | 3  | Betis             | Extra virgin olive oil                            | Spain                             |
|              | 4  | Bargallo          | Extra virgin olive oil                            | Spain                             |
|              | 5  | Olivoila          | First cold pressed olive oil                      | the Mediterranean                 |
|              | 6  | Kniser Lena Mest  | Olive blend oil                                   | Nanchang City, Jiangxi Province   |
|              | 7  | Agric             | Extra virgin olive oil                            | Greece                            |
|              | 8  | Evergrand Khingan | Extra virgin olive oil                            | Spain                             |
|              | 9  | Dintel            | Extra virgin olive oil                            | Spain                             |
|              | 10 | Rhino             | Extra virgin olive oil                            | Spain                             |
|              | 11 | Mueloliva         | Extra virgin olive oil                            | Spain                             |
|              | 12 | Tree Life         | Extra virgin oilve oil                            | Australia                         |
|              | 13 | Great Value       | 100% extra virgin oilve oil                       | Spain                             |
|              | 14 | Olitalia          | Extra virgin olive oil                            | Italy                             |
| Camellia oil | 1  | Sunplan           | Camellia oil                                      | Ningde City, Fujian Province      |
|              | 2  | Sunplan           | Camellia oil for the women who are in confinement | Ningde City, Fujian Province      |
|              | 3  | jinjian           | Original ecology clod-pressed camellia oil        | Liuyang City, Hunan Province      |
|              | 4  | Jinshibenxiang    | Camellia oil                                      | Yichun City, Jiangxi Province     |

|               |    |                      |                                   |                                          |
|---------------|----|----------------------|-----------------------------------|------------------------------------------|
|               | 5  | Oil-tea camellia oil | Camellia oil                      | Shanghai                                 |
|               | 6  | Qiandaoyuan          | Camellia oil                      | Hangzhou City, Zhejiang Province         |
|               | 7  | Arawana              | Camellia oil                      | Shanghai                                 |
|               | 8  | Jinshibenxiang       | Camellia oil                      | Yichun City, Jiangxi Province            |
|               | 9  | First Kitvhen        | Camellia oil                      | Shangrao City, Jiangxi Province          |
|               | 10 | Qiyunshan            | Camellia oil                      | Qiyunshan, Jiangxi Province              |
|               | 11 | Runxin               | Organic camellia oil              | Yichun City, Jiangxi Province            |
| Sunflower oil | 1  | Fine Life            | First grade sunflower oil         | Suzhou City, Jiangsu Province            |
|               | 2  | Pietro Coricell      | Sunflower oil                     | Italy                                    |
|               | 3  | Richevo              | sunflower seed oil                | Spain                                    |
|               | 4  | Meilin               | Sunflower oil                     | Handan City, Hebei Province              |
|               | 5  | Westerner            | First grade pressed sunflower oil | Lanzhou City, Gansu Province             |
|               | 6  | Luhua                | Squeezing sunflower seed oil      | Hohhot, Inner Mongolia Autonomous Region |
|               | 7  | Runji                | First grade pressed sunflower oil | Shanghai                                 |
|               | 8  | Fulinmen             | First grade pressed sunflower oil | Bengbu City, Anhui Province              |
|               | 9  | Abrilsol             | Refined sunflower oil             | Spain                                    |
|               | 10 | Yuchushanpin         | sunflower seed oil                | Hohhot, Inner Mongolia Autonomous Region |
|               | 11 | Dhenp                | Refined sunflower oil             | Ukraine                                  |
|               | 12 | Longevity Flower     | Fragrant sunflower seed oil       | Binzhou City, Shandong Province          |
|               | 13 | Great Value          | Sunflower seed oil                | Nantong City, Jiangsu Province           |
|               | 14 | Evergrand Khingan    | Sunflower seed oil                | Nantong City, Jiangsu Province           |
|               | 15 | Mighty               | Sunflower seed oil                | Hohhot, Inner Mongolia Autonomous Region |
| Corn oil      | 1  | Wesson               | Corn oil with cholesterol free    | America                                  |
|               | 2  | Zhongchang           | Corn oil rich in tocopherol       | Wuhan City, Hubei Province               |
|               | 3  | Arowana              | Corn oil rich in sterols          | Wuhan City, Hubei Province               |

|              |    |                  |                                          |                                     |
|--------------|----|------------------|------------------------------------------|-------------------------------------|
|              | 4  | Runji            | Pressed corn oil                         | Shanghai                            |
|              | 5  | Fulinmen         | Pressed corn oil rich in sterols         | Huanggang City, Hubei Province      |
|              | 6  | Xiwang           | Physical pressed corn oil                | Zouping City, Shandong Province     |
|              | 7  | Arowana          | Pressed corn oil with 8000 ppm sterols   | Wuhan City, Hubei Province          |
|              | 8  | Fulinmen         | Pressed corn oil rich in sterols         | Zhangjiagang City, Jiangsu Province |
|              | 9  | Carepal          | King corn oil                            | Siping City, Jilin Province         |
|              | 10 | Guchuan          | First grade pressed corn oil             | Beijing                             |
|              | 11 | Wannianxing      | Pressed corn oil                         | Heilongjiang Province               |
|              | 12 | Luhua            | Squeezing corn oil                       | Chongqing                           |
|              | 13 | Fufeng           | First grade pressed corn oil             | Linyi City, Shandong Province       |
|              | 14 | Knife            | Corn oil                                 | Shenzhen City, Guangdong Province   |
|              | 15 | Zhongchang       | Corn oil                                 | Hubei Province                      |
| Rice oil     | 1  | Costadoro        | Rice bran oil                            | Italy                               |
|              | 2  | Olitalia         | Rice bran oil                            | Italy                               |
|              | 3  | Jinwang          | Rice bran oil                            | Laohekou City, Hubei Province       |
|              | 4  | Arowana          | Rice bran oil with 3000 ppm oryzanol     | Shenzhen City, Guangdong Province   |
|              | 5  | Costadoro        | Rice bran oil with gamma oryzanol        | Italy                               |
|              | 6  | Longevity Flower | Rice embryo oil                          | Binzhou City, Shandong Province     |
|              | 7  | Jinwang          | Preseed rice bran oil                    | Laohekou City, Hubei Province       |
| Flaxseed oil | 1  | Aidu             | Flaxseed oil                             | Zhangjiakou City, Hebei Province    |
|              | 2  | Dinghe           | Flaxseed oil rich in essential nutrients | Inner Mongolia Autonomous Region    |
|              | 3  | Chengrun         | flaxseed oil                             | Ningxia                             |
|              | 4  | Benchi           | Cold-pressed dewaxed flaxseed oil        | Inner Mongolia Autonomous Region    |
|              | 5  | Kunhua           | 100% pure flaxseed oil                   | Anyang City, Henan Province         |
|              | 6  | Grandma Kitchen  | Flaxseed oil                             | Inner Mongolia Autonomous Region    |

|                |    |                |                                       |                                  |
|----------------|----|----------------|---------------------------------------|----------------------------------|
|                | 7  | Mengguxiang    | Cold-pressed dewaxed flaxseed oil     | Inner Mongolia Autonomous Region |
|                | 8  | Xinqidian      | Flaxseed oil                          | Zhangjiakou City, Hebei Province |
|                | 9  | Yipinhong      | First grade pressed flaxseed oil      | Jinchang City, Gansu Province    |
|                | 10 | Yuchushanpin   | flaxseed oil                          | Inner Mongolia Autonomous Region |
| Walnut oil     | 1  | Nouriz         | Physical pressed walnut oil           | France                           |
|                | 2  | Kangbangmeiwei | Wild walnut oil                       | Yunnan                           |
|                | 3  | La Tourangelle | Roasted walnut oil                    | California                       |
| Peony seed oil | 1  | Ruipu          | Peony seed oil                        | Tongling City, Anhui Province    |
|                | 2  | Ren Tang       | Peony seed oil                        | Tongling City, Anhui Province    |
|                | 3  | Nanyuanguose   | Extraction of valuable peony seed oil | Changzhou City, Jiangsu Province |
| Grapeseed oil  | 1  | Sosafty        | First grade grapeseed oil             | Gaomi City, Shandong Province    |
|                | 2  | Jingsenlikang  | 100% Pure grapeseed oil               | Anyang City, Henan Province      |
|                | 3  | La masfia      | Grapeseed oil                         | Spain                            |
